# Supplementary material
Source: Research Square preprint supplement (doi:10.21203/rs.3.rs-10153523/v1)
Supplement: Supplementary file 1 [file cba6ba3df7e3a43c6a8c1905.docx]

1. OLAHW and solution treatment yield 2507 SDSS joints with proper phase ratio.

2. Oscillating laser refines HAZ ferrite grains from 26.4 to 13.6 μm.

3. Oscillation shifts fracture to base metal, boosting mechanical properties.

4. Synergy achieves optimal ductility and corrosion resistance in the joints.
